# Supplementary material for: Fatal Injuries and Nonfatal Occupational Injuries and Illnesses Involving Insects, Arachnids, and Mites
Source: MDPI journal article supplement (doi:10.3390/pharmaceutics14020311), 2014-01-01
Supplement: s1 [file s1]

## Supplemental Information

*Manuscript: Theranostic microbubbles with homogeneous ligand distribution for higher binding efficacy*

Simone A.G. Langeveld<sup>1</sup>, Bram Meijlink<sup>1</sup>, Inés Beekers<sup>1,2</sup>, Mark Olthof<sup>1</sup>, Antonius F.W. van der Steen<sup>1</sup>, Nico de Jong<sup>1,3</sup>, Klazina Kooiman<sup>1</sup>

<sup>1</sup> Department of Biomedical Engineering, Thoraxcenter, Erasmus University Medical Center, Rotterdam, the Netherlands.

<sup>2</sup> Department of Health, ORTEC B.V., Zoetermeer, the Netherlands

<sup>3</sup> Laboratory of Medical Imaging, Department of Imaging Physics, Delft University of Technology, Delft, the Netherlands.

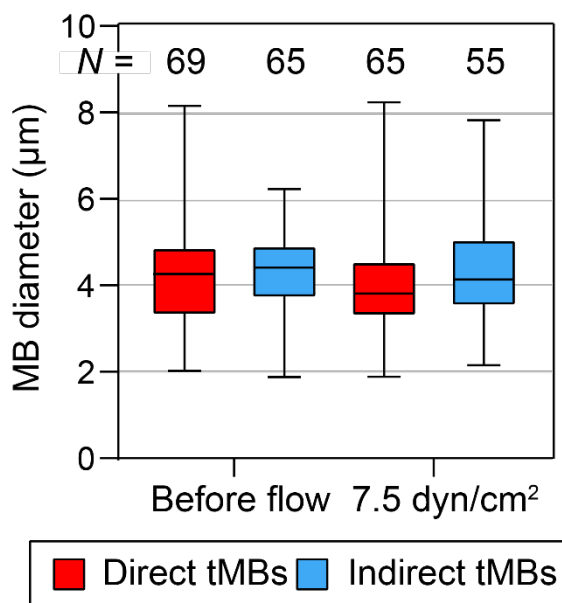

**Figure S1.** Diameter (μm) of bound direct and indirect targeted microbubbles (tMBs) from dissociation under flow assay with HUVEC monolayer *in vitro*. Diameters were measured in a frame from the recorded confocal time lapse video before flow was started, and at the end of the assay at 7.5 dyn/cm². Boxplots are shown with median, IQR, and whiskers from min to max.

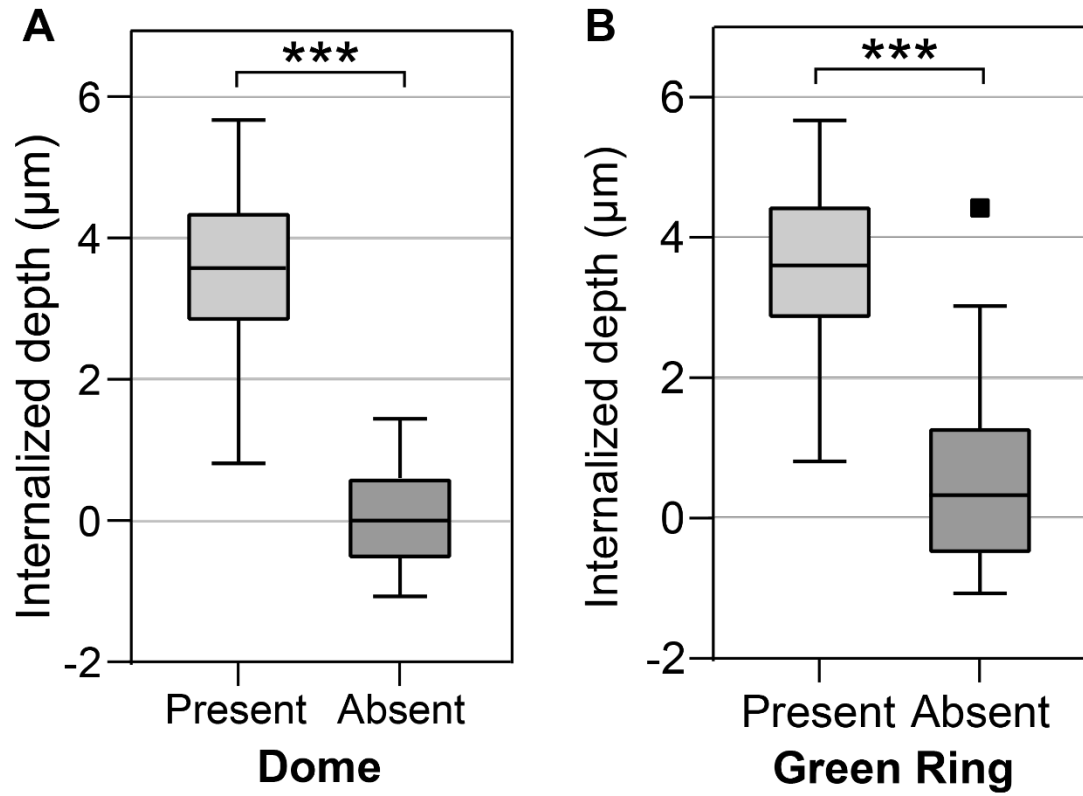

**Figure S2.** Internalized depth of (A) bound targeted microbubbles with a dome present ( $N = 41$ ) or absent ( $N = 20$ ), and (B) bound targeted microbubbles with a green ring present ( $N = 37$ ) or absent ( $N = 24$ ) in the CellMask Green channel, shown as boxplot with outlier in black (square). Significance is indicated with \*\*\* $p < 0.001$ .

## List of used abbreviations

BSA: bovine serum albumin; CAM: chorioallantoic membrane; DiD: 1,1'-dioctadecyl-3,3,3',3'-tetramethylindodicarbocyanine perchlorate; Dil: 1,1'-dioctadecyl-3,3,3',3'-tetramethylindodicarbocyanine perchlorate; DSPC: 1,2-distearoyl-sn-glycero-3-phosphocholine; EGM: Endothelial Cell Growth Medium; FOV: field of view; HUVEC: human umbilical vein endothelial cell; ICAM: intracellular adhesion molecule; IQR: interquartile range; PBS: phosphate buffered saline; VCAM: vascular cell adhesion molecule; VEGFR2: vascular endothelial growth factor receptor 2
